# Supplementary material for: The Influence of Carbonaceous Matrices and Electrocatalytic MnO2 Nanopowders on Lithium-Air Battery Performances
Source: MDPI journal article supplement (doi:10.3390/nano6010010), 2016-01-06
Supplement: s1 [file s1]

## Supplementary Materials

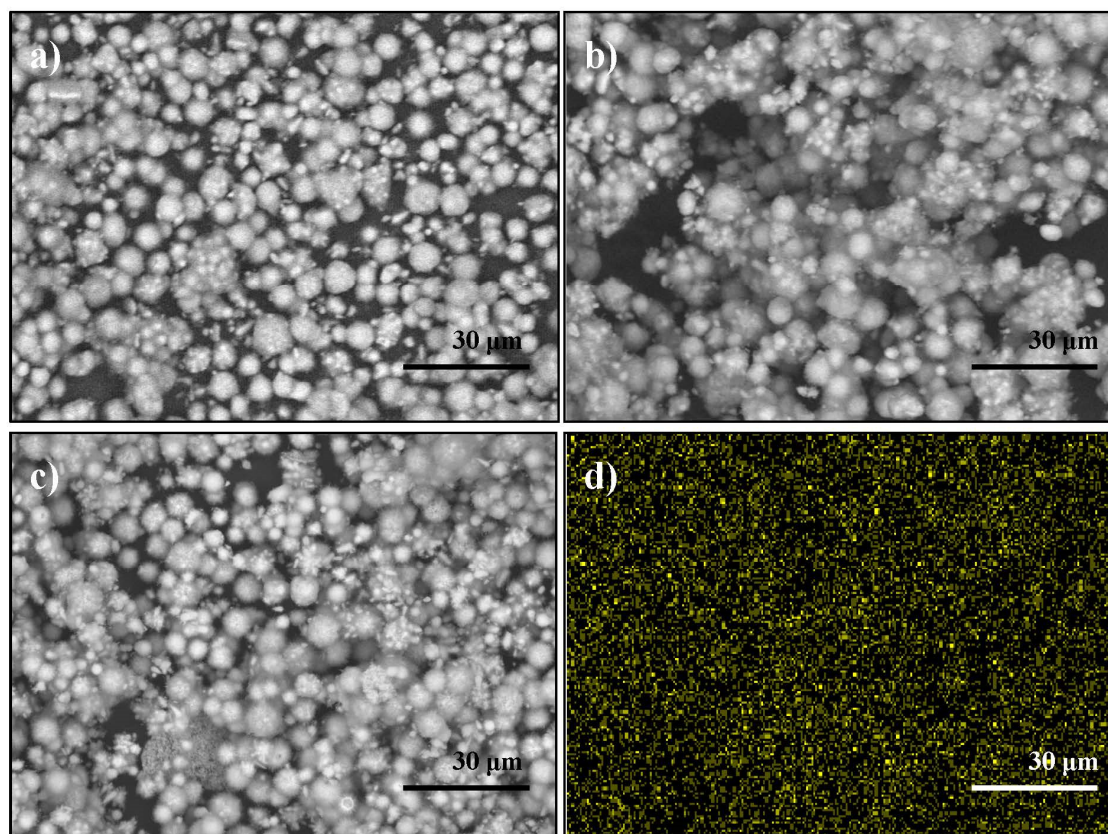

**Figure S1.** Scanning electron microscopy (SEM) images of (a) hydrothermal (M\_hydro), (b) calcined (M\_500) and (c) silver-doped (M\_hydro\_1.0%Ag) samples, (d) Energy dispersive X-ray (EDX) mapping of M\_hydro\_1.0%Ag powder.

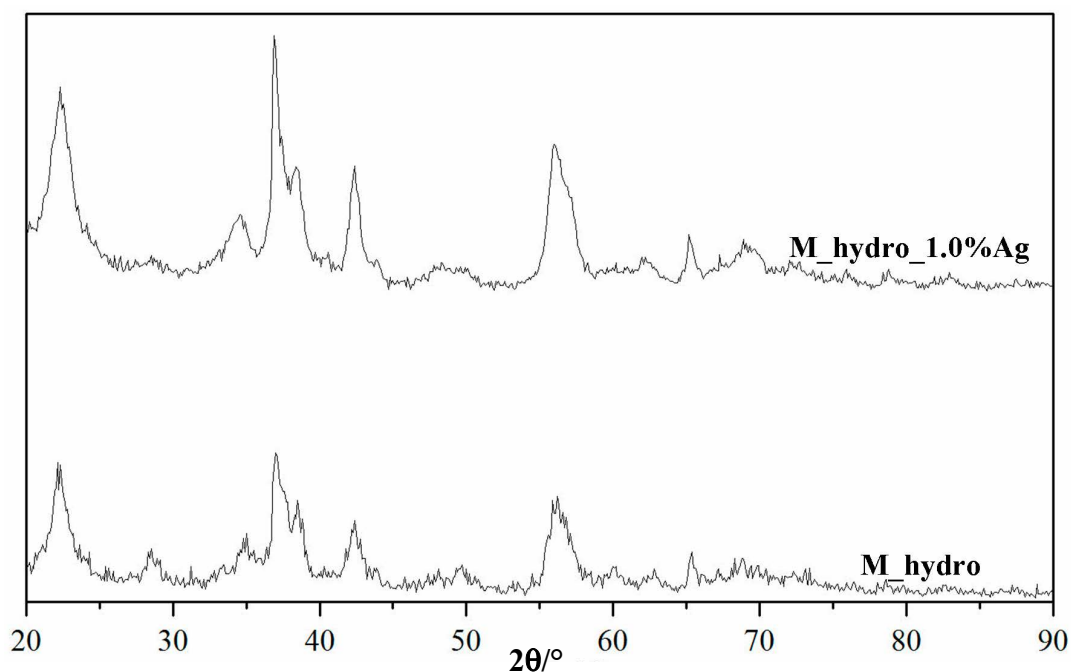

**Figure S2.** Comparison between X-ray powder diffraction (XRPD) patterns of pure (M\_hydro) and Ag-doped MnO<sub>2</sub> (M\_hydro\_1.0%Ag) samples.

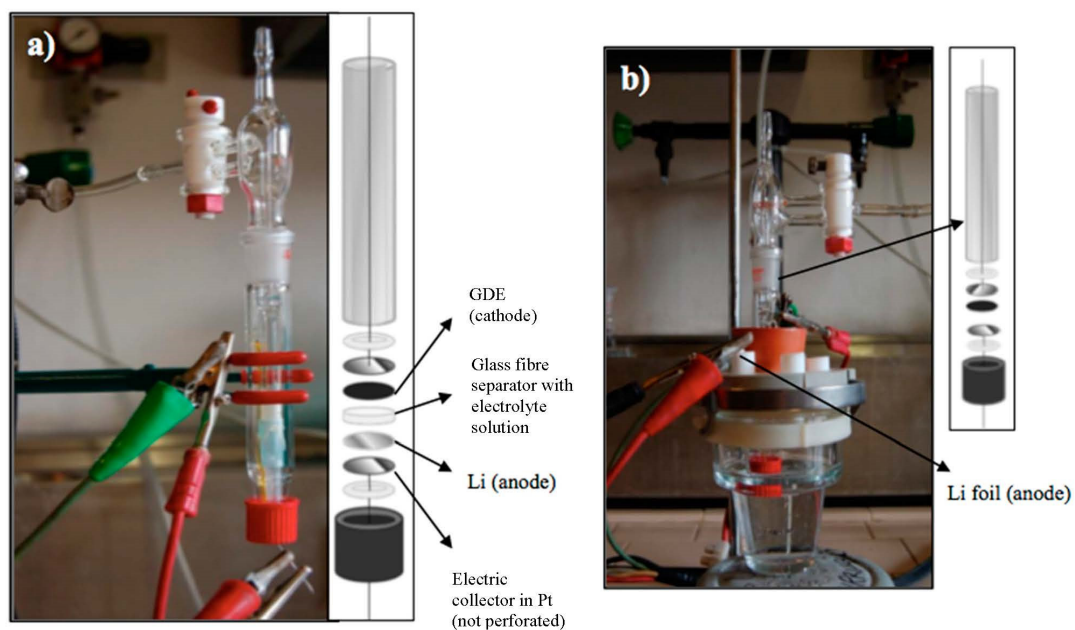

**Figure S3.** Cell configurations used for the electrochemical tests: (a) a Swagelok™-type cell (S-cell) and (b) a home-made cell (H-cell).

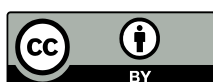

© 2016 by the authors; licensee MDPI, Basel, Switzerland. This article is an open access article distributed under the terms and conditions of the Creative Commons by Attribution (CC-BY) license (<http://creativecommons.org/licenses/by/4.0/>).
